# Supplementary material
Source: PubMed Central journal article supplement (PMC6307953)
Supplement: jci-129-99751-s079.pdf [file jci-129-99751-s079.pdf]

# Supplemental data

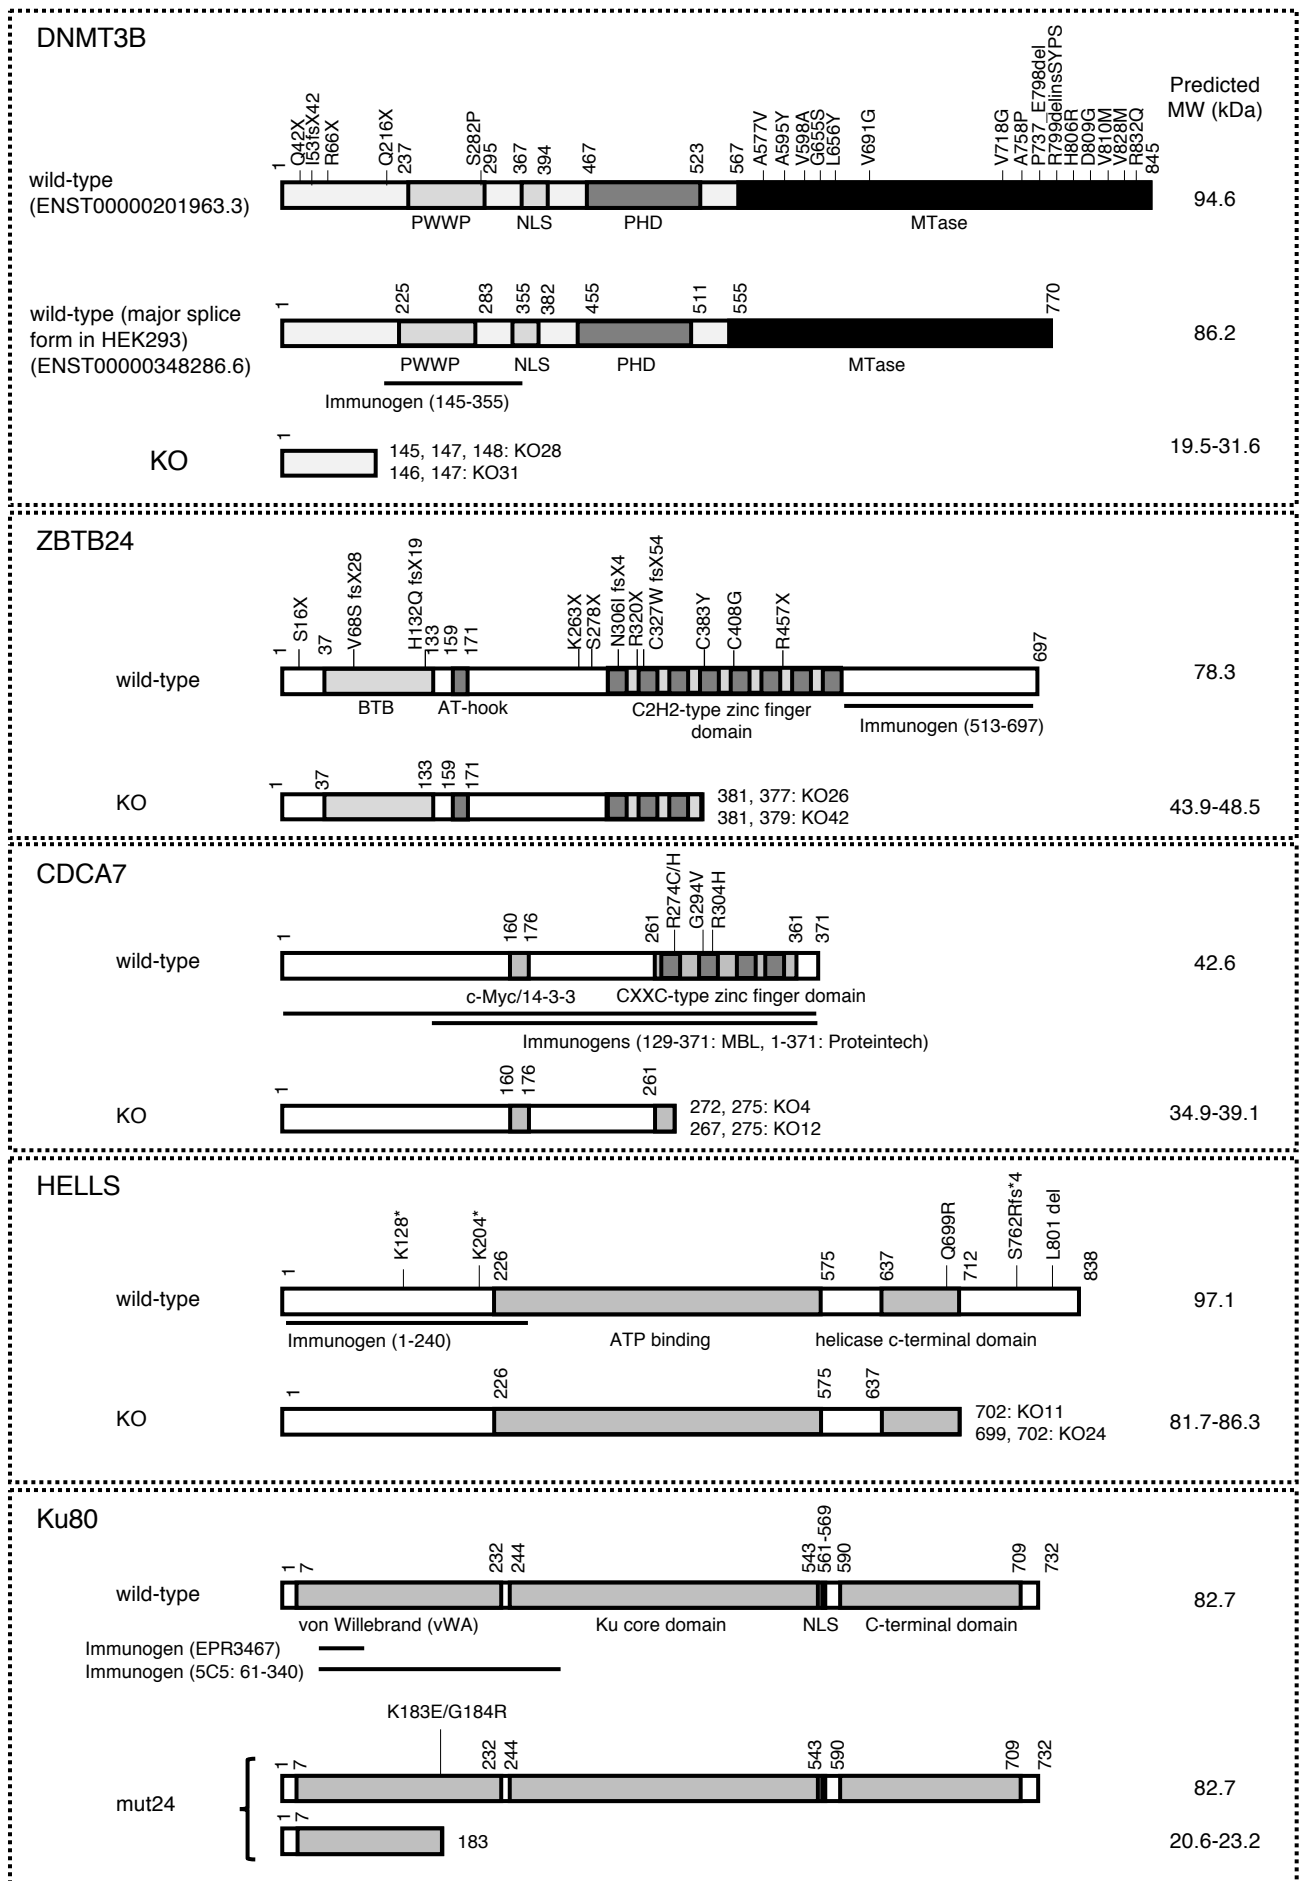

**Supplemental Figure 1. Structure of wild-type ICF proteins and Ku80, mutations identified in ICF patients, and predicted truncated proteins in mutant HEK293 cells.** Predicted molecular weights (MW) and immunogens recognized by the antibodies used for Western blotting are indicated. See also [Supplemental Table 5](#) for the truncated proteins in mutant cells.

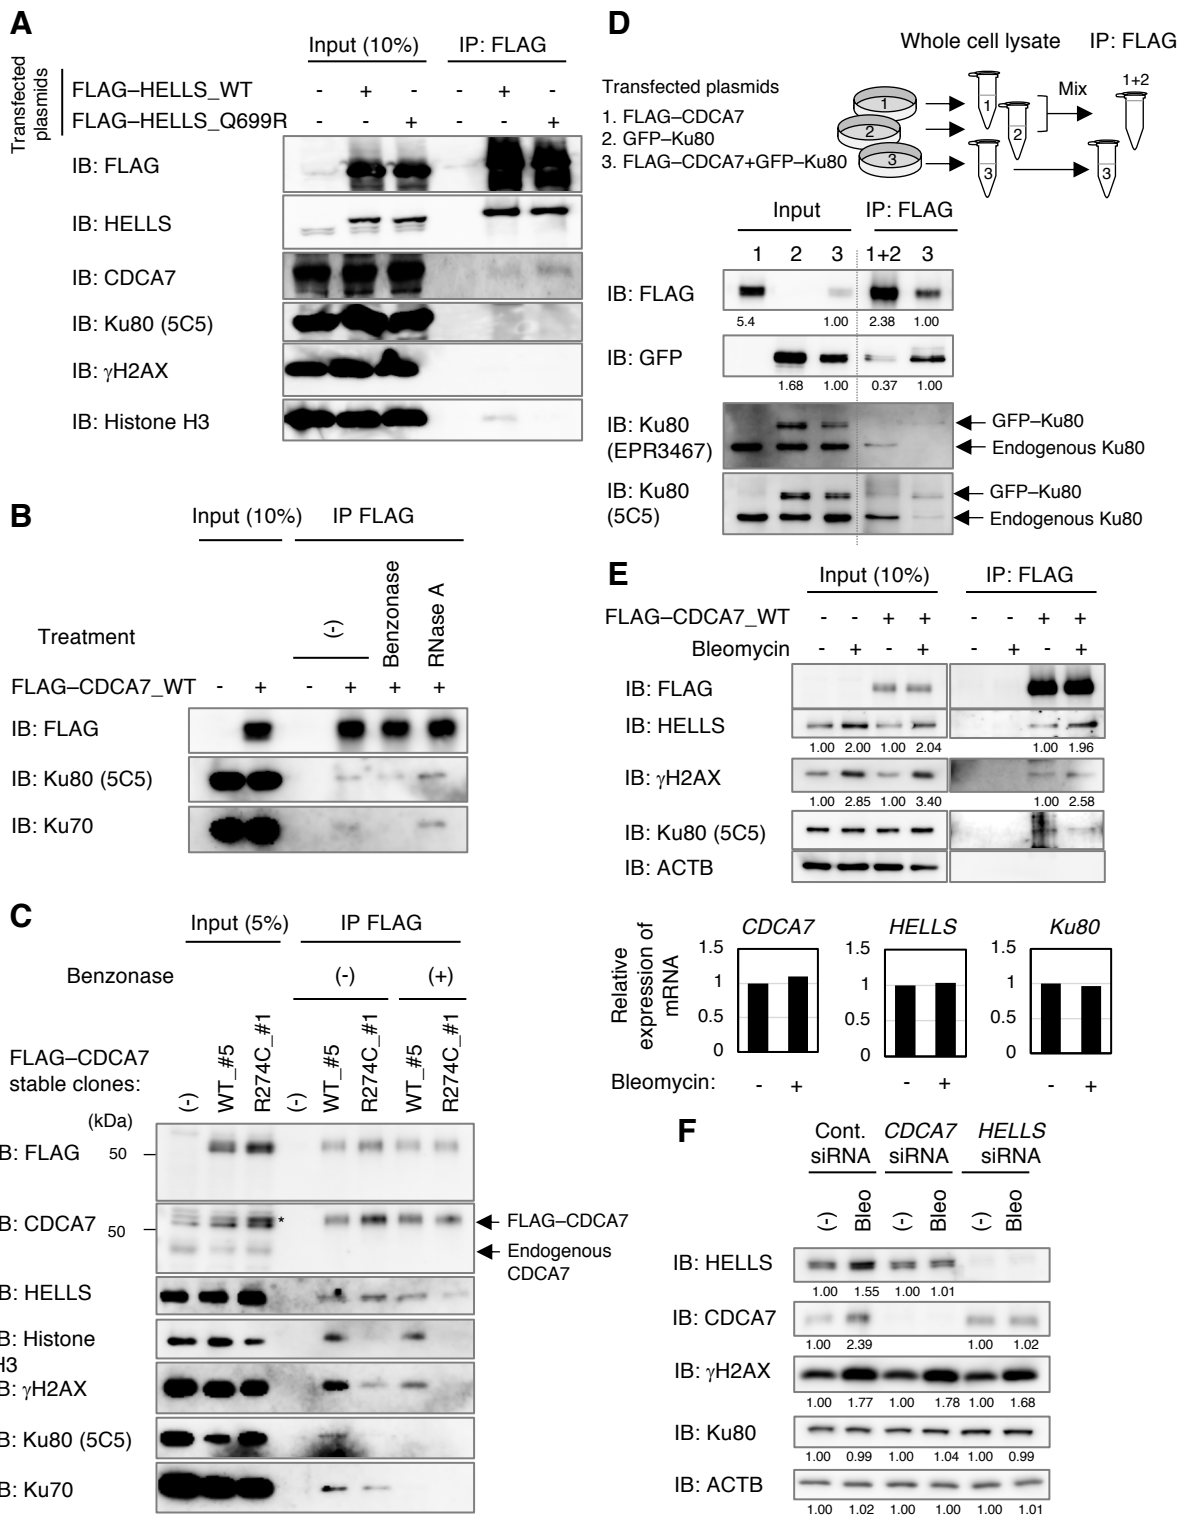

**Supplemental Figure 2. Evaluation of coimmunoprecipitation of HELLS, Ku80, and γH2AX with CDCA7 under various conditions.** (A) Coimmunoprecipitation of indicated proteins with FLAG-HELLS\_WT or \_Q699R assessed by Western blotting. (B) The Ku80/Ku70 heterodimer interacts with CDCA7 via DNA, not RNA. (C) Coimmunoprecipitation of indicated proteins detected by Western blotting in HEK293 clones stably expressing FLAG-CDCA7\_WT (clone #5) or \_R274C (clone #1) at a near endogenous CDCA7 level. An asterisk indicates a non-specific band overlapping with FLAG-CDCA7\_WT and \_R274C. (D) Exclusion of artificial interaction. HEK293T cells were spread into three culture dishes, and transfected with #1 FLAG-CDCA7, #2 GFP-Ku80, or #3 both FLAG-CDCA7 and GFP-Ku80. After 48 h, whole cell lysates were prepared, and those from dish #1 and #2 were mixed. FLAG-CDCA7 was immunoprecipitated with associated proteins to evaluate the possibility of post-preparation interaction between CDCA7 and Ku80. Whole cell lysate from dish #3 was used as a positive control. The signal intensity described below each image was obtained by Image Quant TL software. (E) Effect of bleomycin treatment on expression and coimmunoprecipitation of indicated proteins. HEK293T cells were treated with (+) or without (-) bleomycin (5 μM) for 30 min. Coimmunoprecipitation of indicated proteins with FLAG-CDCA7 was assessed by Western blotting (top). Expression of *CDCA7*, *HELLS*, and *Ku80* mRNAs was detected by qRT-PCR (bottom). *ACTB* was a control. (F) Effect of bleomycin treatment on the stability of CDCA7 upon HELLS depletion and vice versa. HEK293T cells were treated with siRNAs against *CDCA7* or *HELLS* 48 h prior to bleomycin treatment (25 μM, 50 min), and subjected to Western blotting. The signal intensity described below each image was obtained by Image Quant TL software.

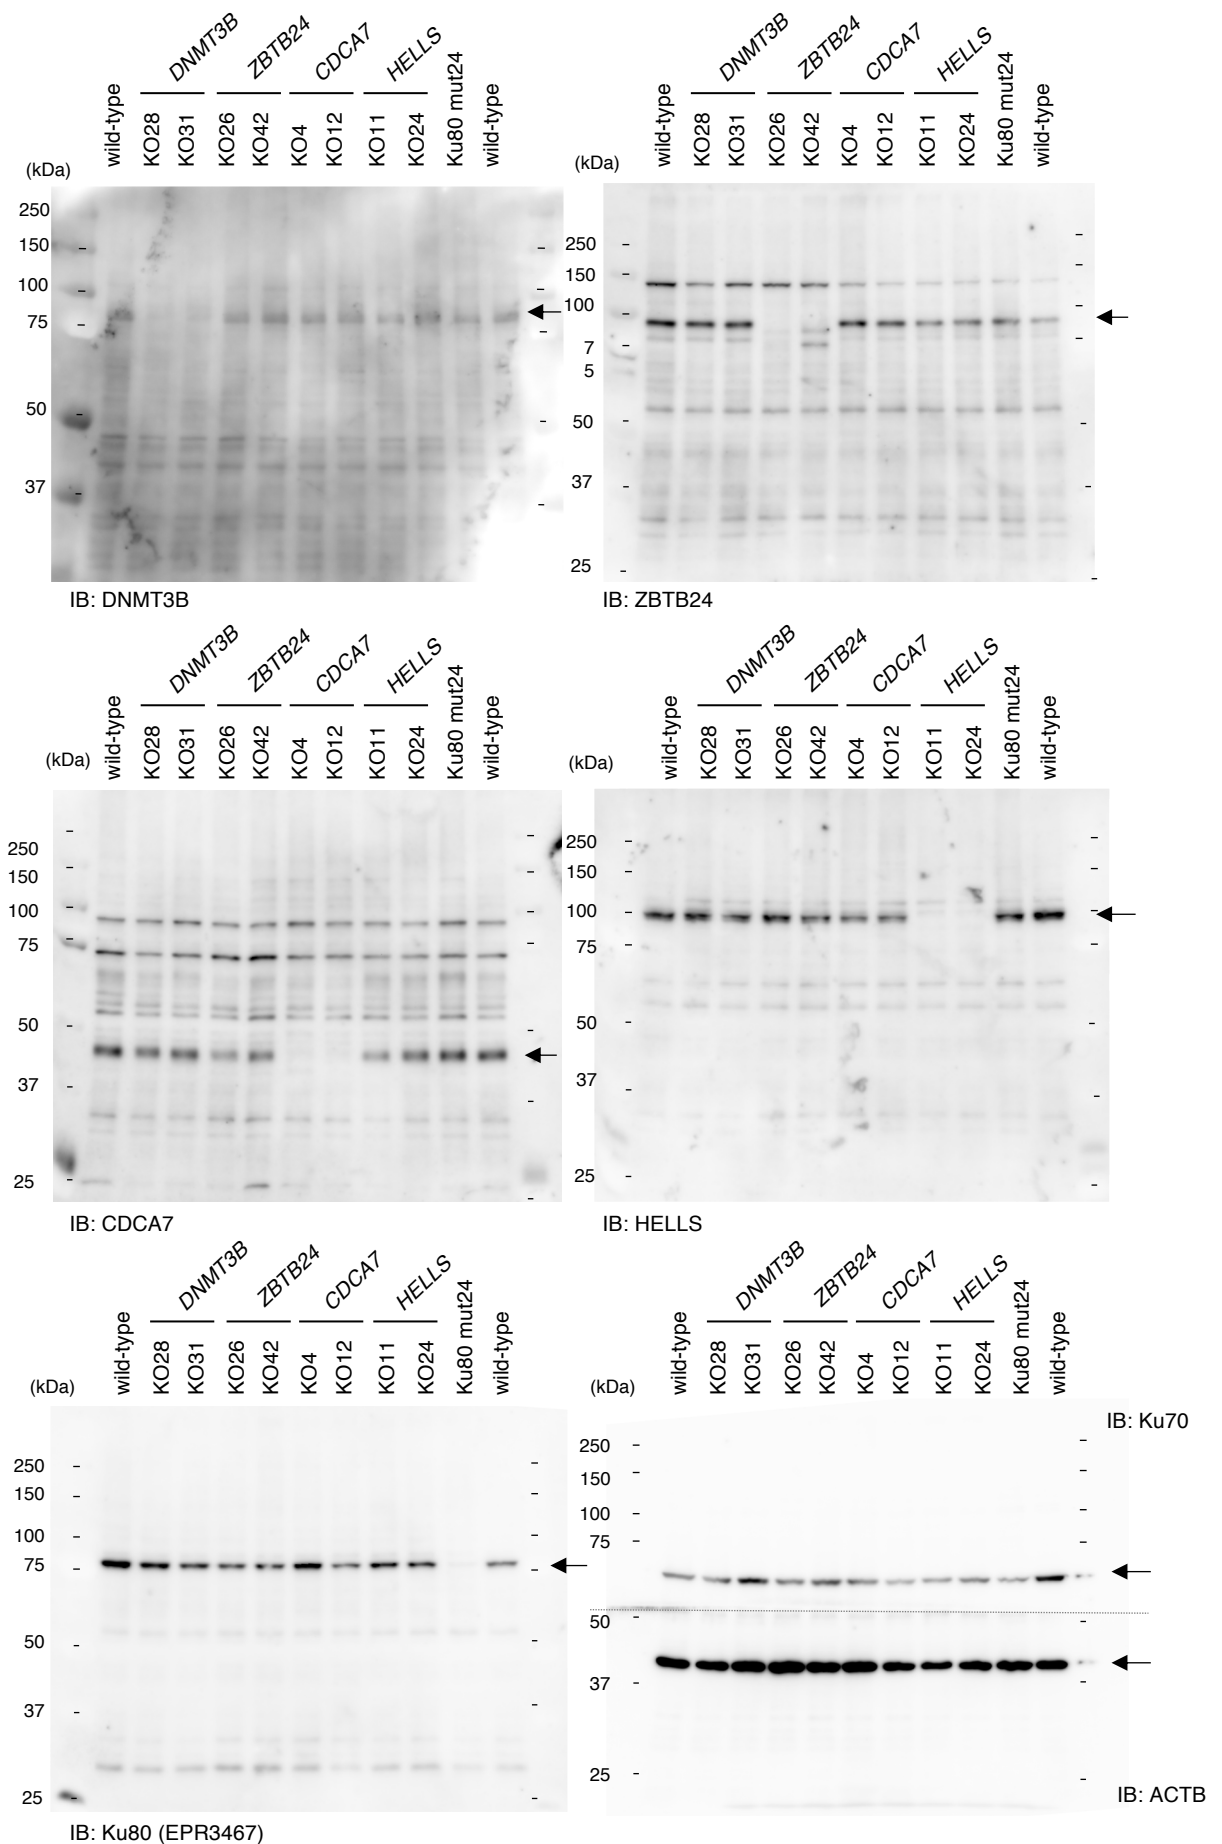

**Supplemental Figure 3. Expression of DNMT3B, ZBTB24, CDCA7, HELLS, Ku80, and Ku70 proteins in mutant cells.** Western blotting was performed using indicated antibodies. Arrows indicate the band representing the wild-type protein. ACTB was a control. The figure is reshown from [Figure 2A](#).

**A**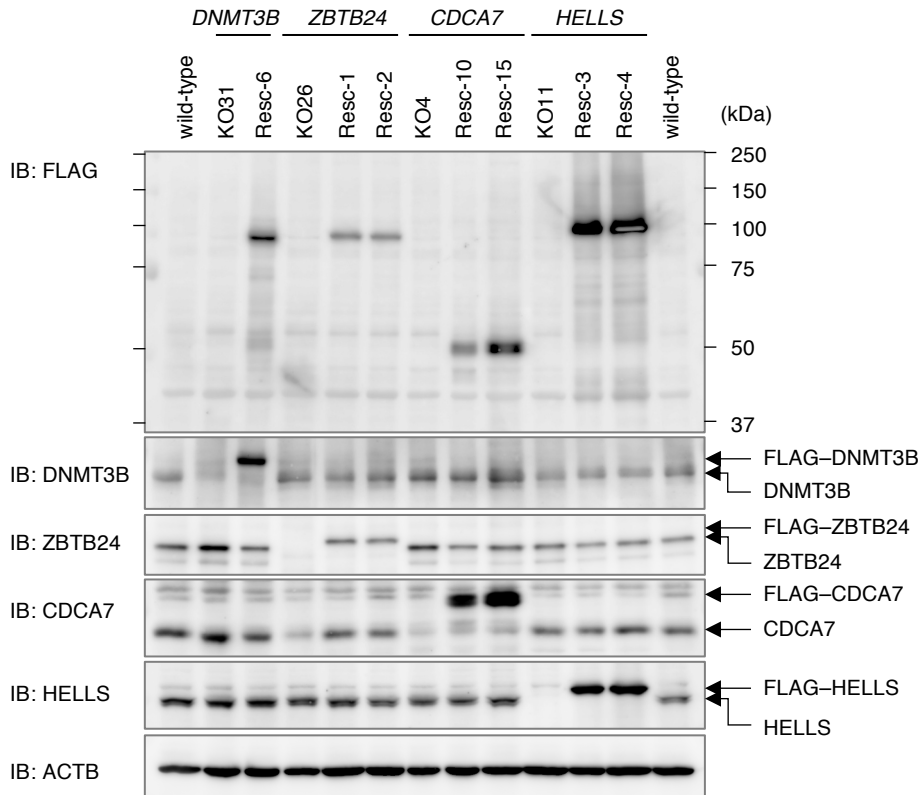**B**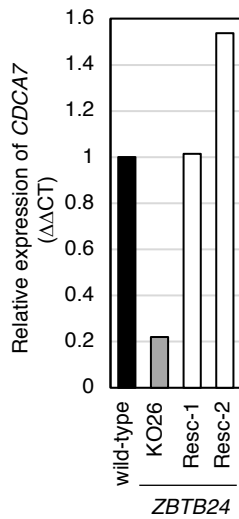**C**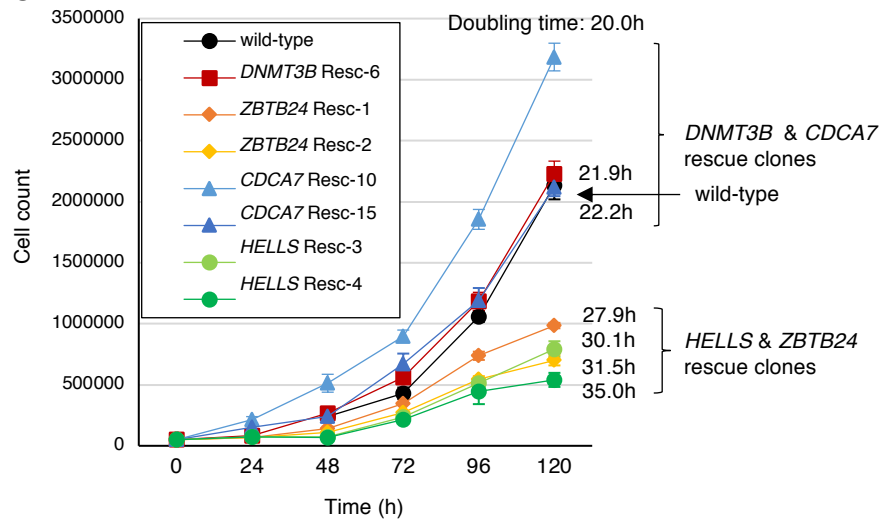

**Supplemental Figure 4. Effects of restoration of wild-type proteins in ICF mutant cells.** (A) Restoration of wild-type proteins confirmed by Western blotting. Two clones expressing FLAG tagged wild-type proteins were established for each mutant clone except for *DNMT3B*, for which only one clone was available. The restored mutant clones were designated “rescue” (Resc) (plus clone number). Western blotting was performed using indicated antibodies. (B) Expression of *CDCA7* mRNA in wild-type, *ZBTB24* mutant (KO26), and two rescue clones (Resc-1 and Z Resc-2) was detected by qRT-PCR. *ACTB* was a control. The expression level of *CDCA7* in wild-type cells was set as 1.0. (C) Proliferation curves of wild-type and rescue clones. Fifty thousand cells were seeded, cultured, and counted after indicated hours (mean  $\pm$  SE, n = 4 for each clone). The average doubling time is shown on the right.

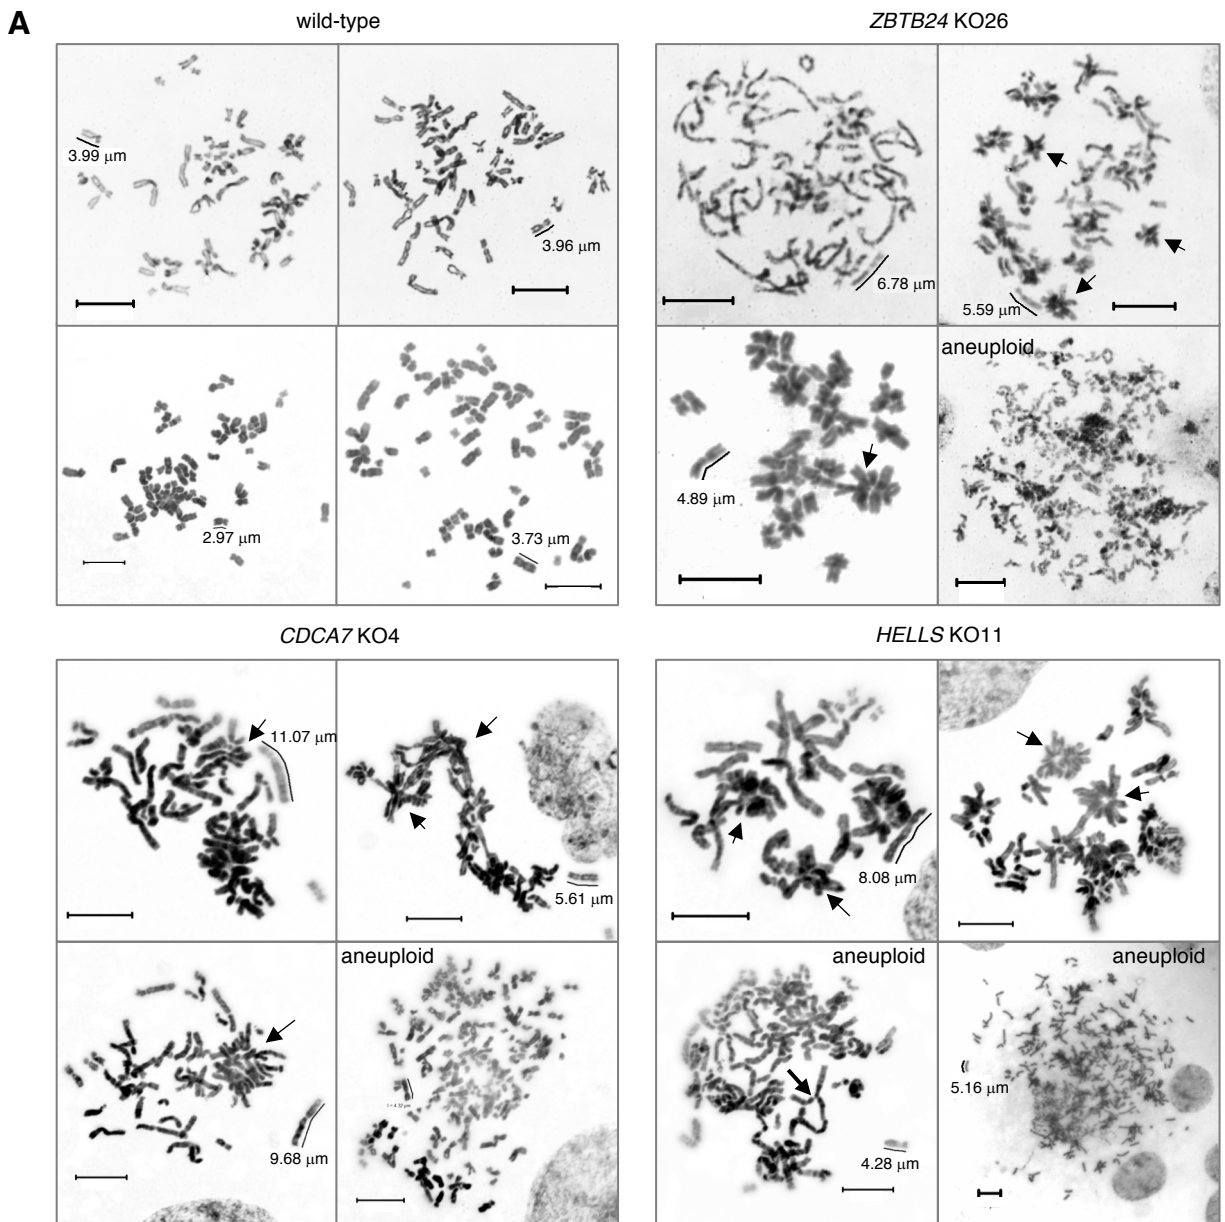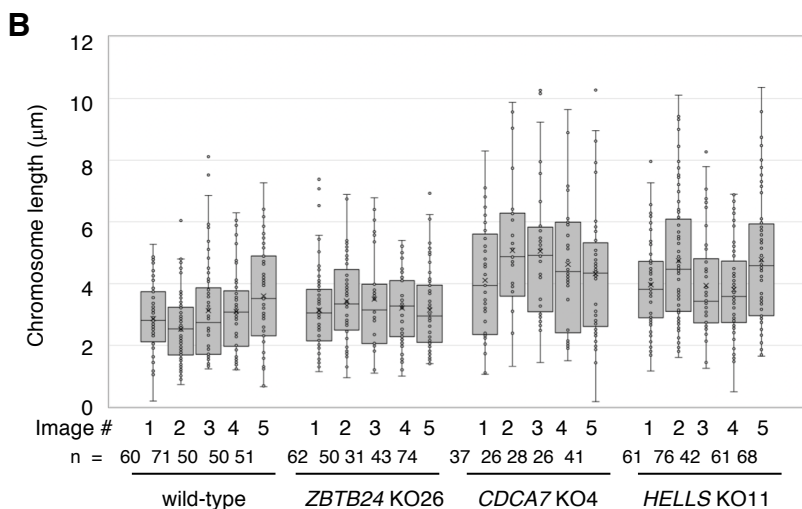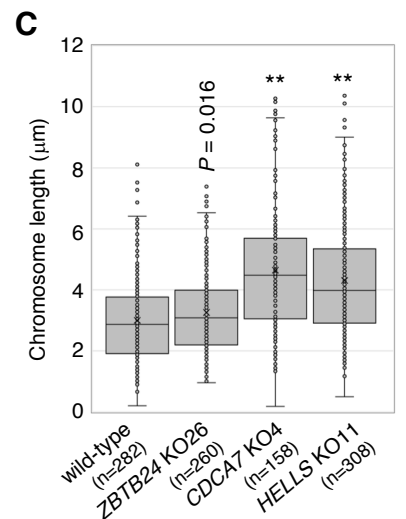

**Supplemental Figure 5. Detection of aneuploidy and chromosomal abnormalities in ICF mutant cells. (A)** Representative images of metaphase spreads (from more than 30 spreads) of wild-type, *ZBTB24* mutant, *CDCA7* mutant, and *HELLS* mutant cells stained by Giemsa or DAPI. Significant increase in aneuploidy was detected in the mutant cells. Many chromosomes were stretched and fragile. Arrows indicate possible chromosomal fusions via centromeric/pericentromeric regions. Scale bars represent 10  $\mu\text{m}$ . **(B)** Average length of chromosomes in the mutant cells. All untangled chromosomes available for measurement (n is described under image#) in five independent spreads were examined per mutant clone. Each box indicates 25–75 percentile and a bar in the box indicates the median. X indicates the mean. **(C)** Combined data presented in **(B)** and statistical significance.  $**P < 0.0017$  (Mann-Whitney *U* test) was considered statistically significant at the 1% levels after Bonferroni correction. The exact *P*-value, which is significant ( $P < 0.05$ ) before the correction, is shown for reference.

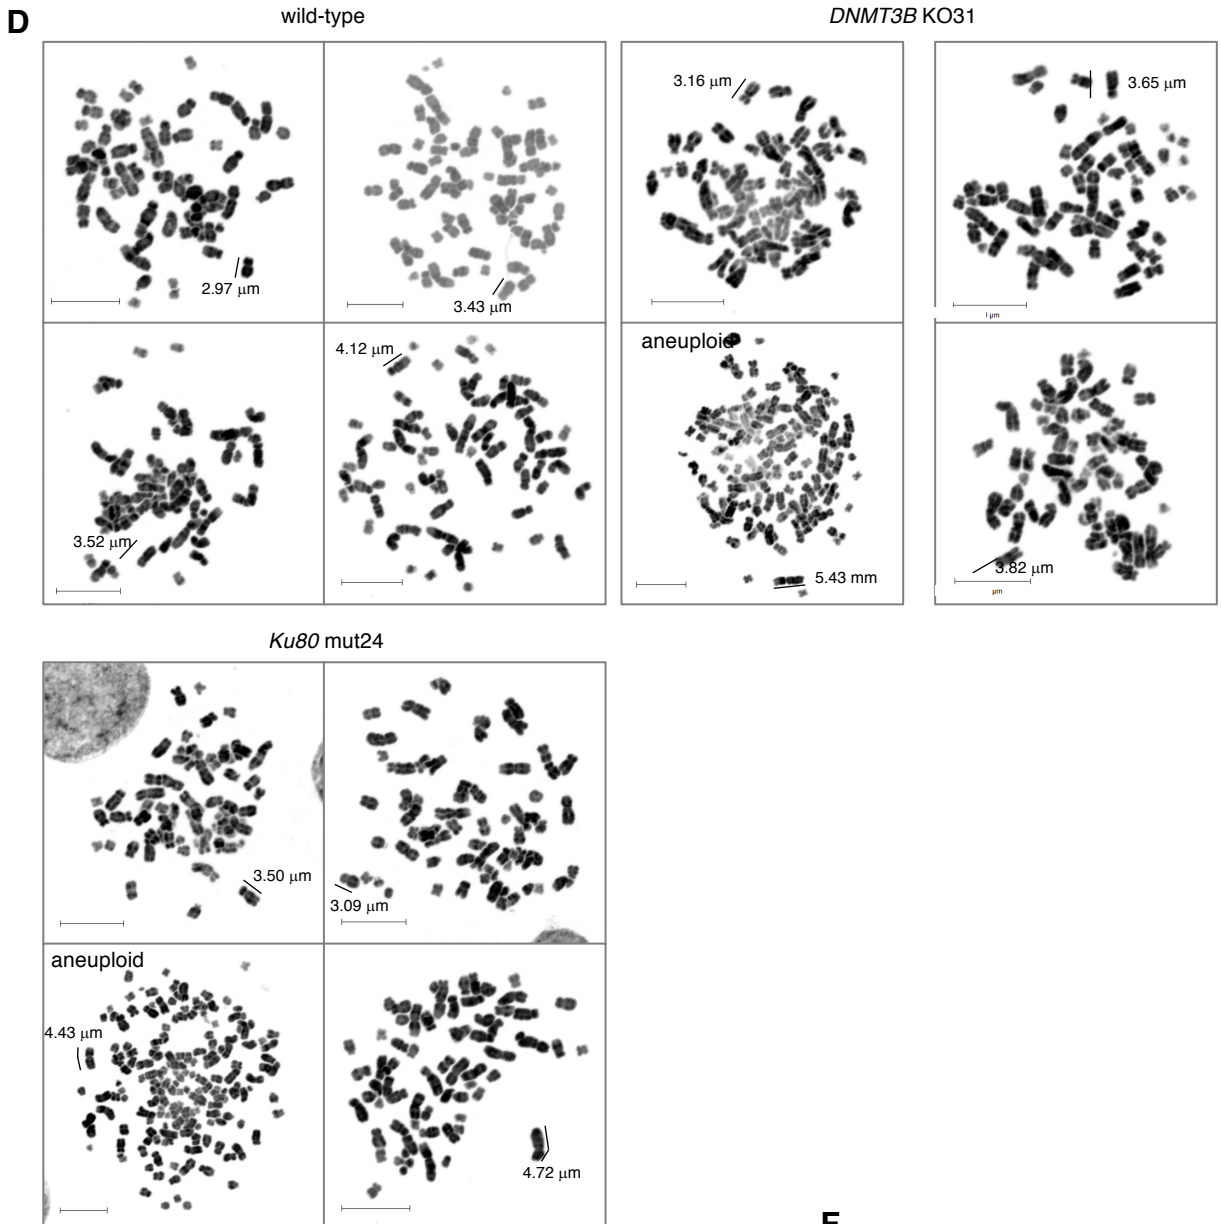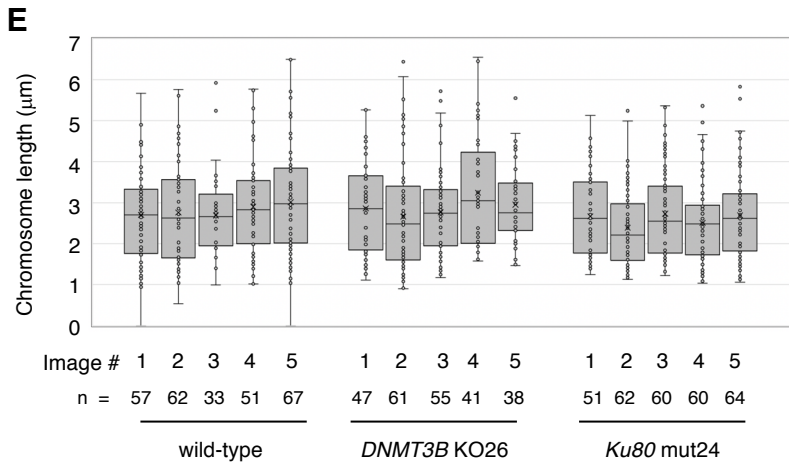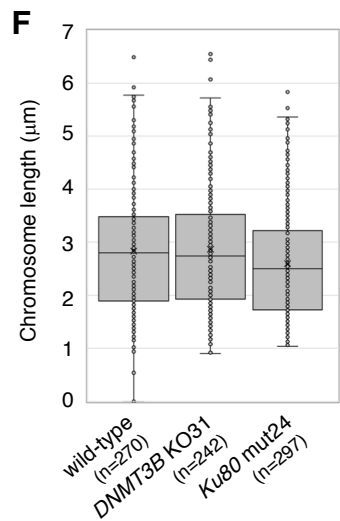

**Supplemental Figure 5 (continued).** (D) Representative images of metaphase chromosome spreads (from 16 spreads) of wild-type, *DNMT3B* mutant, and *Ku80* mutant cells stained by DAPI. Significant increase in aneuploidy was detected, but chromosomes were not stretched or fragile. Scale bars represent 10  $\mu\text{m}$ . (E) Average length of chromosomes in mutant cells. Five independent spreads were examined per mutant clone. Each box indicates 25–75 percentile and a bar in the box indicates the median. X indicates the mean. (F) Combined data presented in (E). There is no statistical significance (Mann–Whitney *U* Test) even before Bonferroni correction.

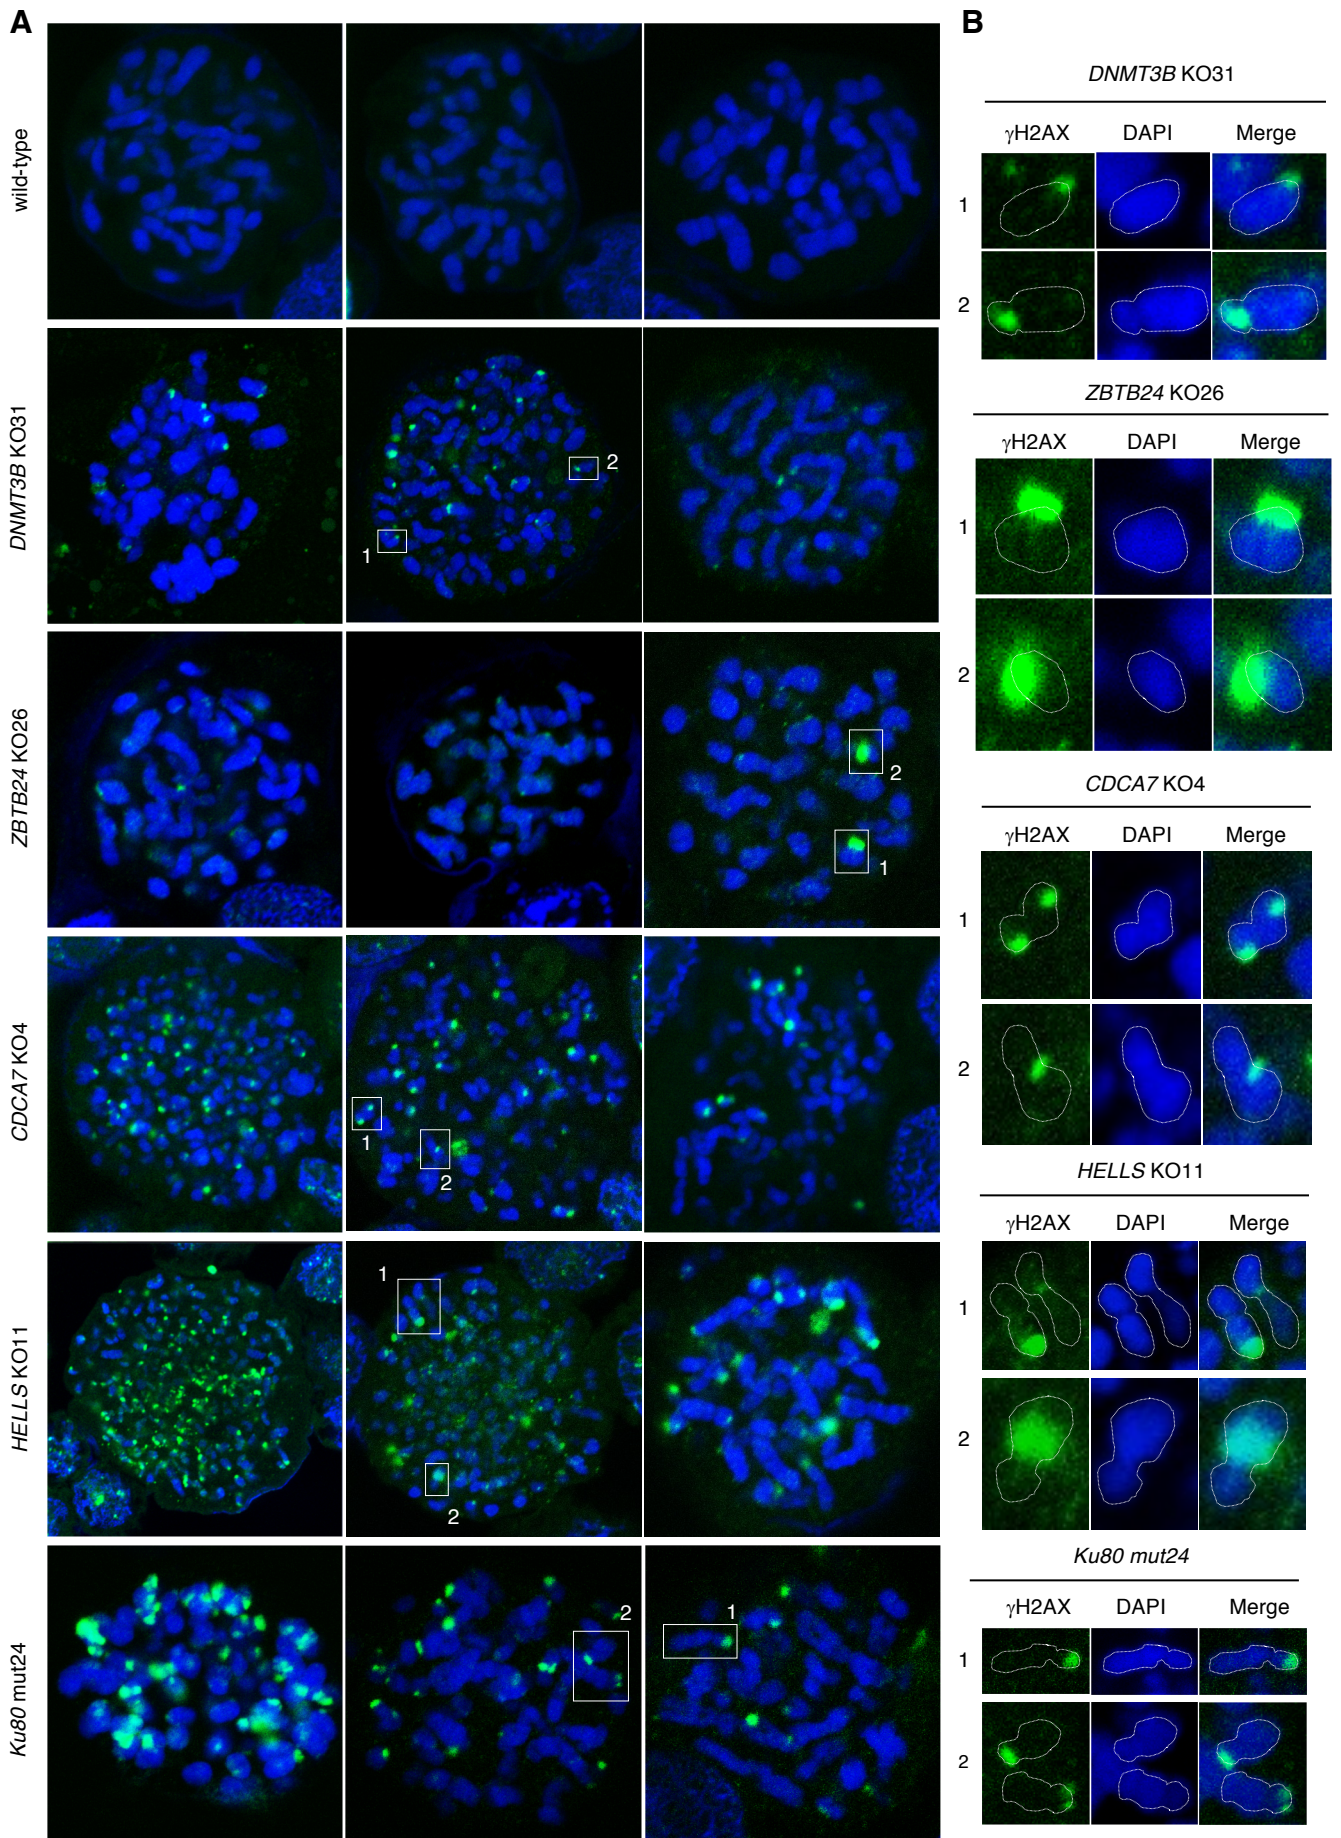

**Supplemental Figure 6. Spontaneous and predominant  $\gamma$ H2AX staining in centromeric, pericentromeric, and telomeric regions.** (A) Three representative metaphase chromosome spreads (from more than ten spreads) of wild-type and mutant cells stained with a  $\gamma$ H2AX antibody (green) and DAPI. (B) Enlarged images of the regions indicated by the boxes numbered 1 and 2.

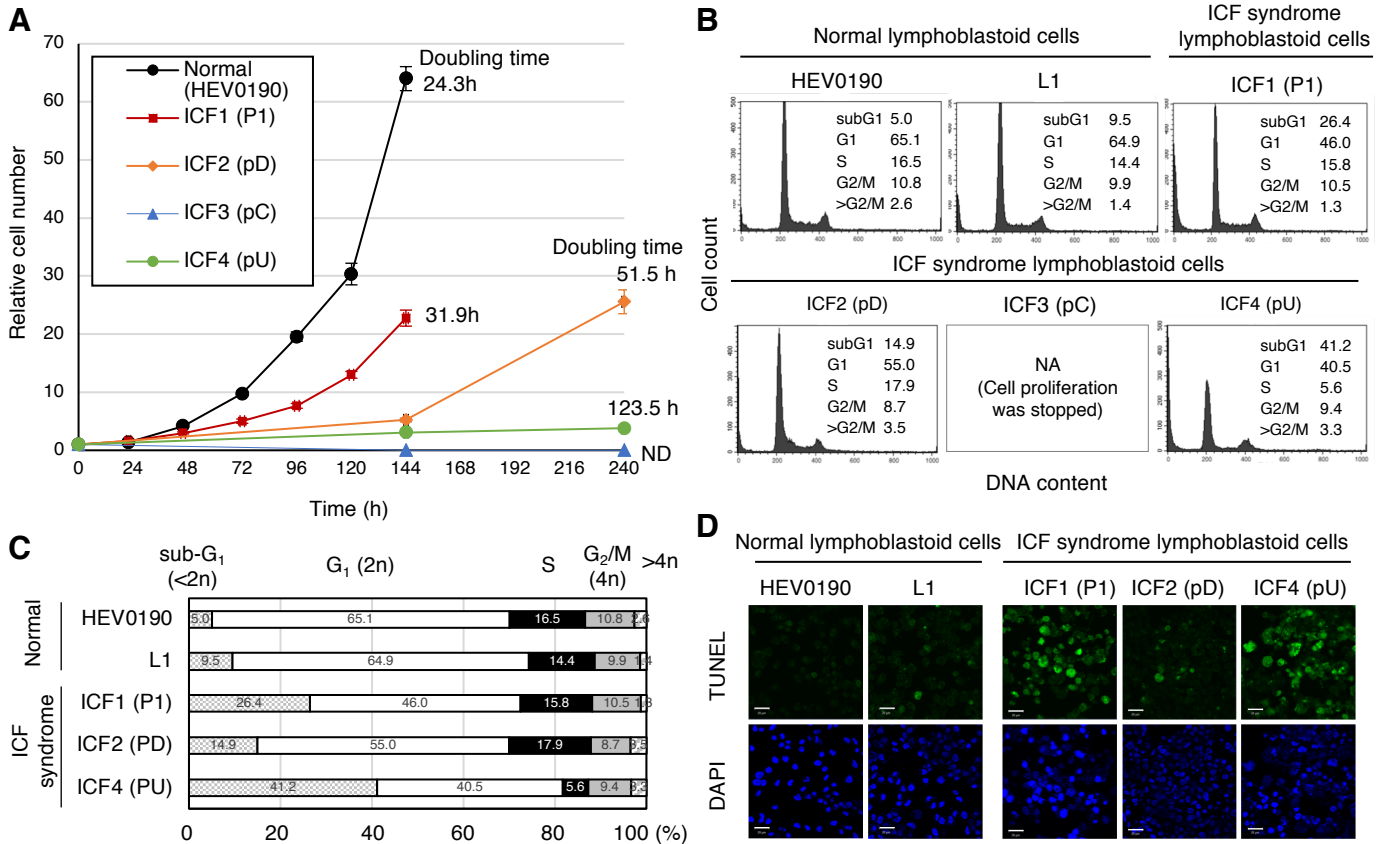

**Supplemental Figure 7. Lymphoblastoid cells from ICF patients display proliferation defects and apoptosis.** (A) Proliferation curves of lymphoblastoid cells derived from a healthy volunteer and ICF patients. Relative cell numbers (the cell number at 0 h is set as 1.0) and average doubling times are shown (mean  $\pm$  SE,  $n = 8$  per each clone). Lymphoblastoid cells from an ICF3 patient (pC) stopped proliferation. ND, not determined. (B and C) Cell cycle analysis of lymphoblastoid cells from healthy volunteers and ICF patients based on DNA content measured by flow cytometry ( $n = 2$ ). NA, not available. (D) Representative images showing apoptotic cells in lymphoblastoid cells from healthy volunteers and ICF patients. For each cell-line, five images were taken and examined. DNA fragmentation was detected by TUNEL assay (green), and nuclei were counterstained with DAPI. Scale bars represent 20  $\mu$ m.



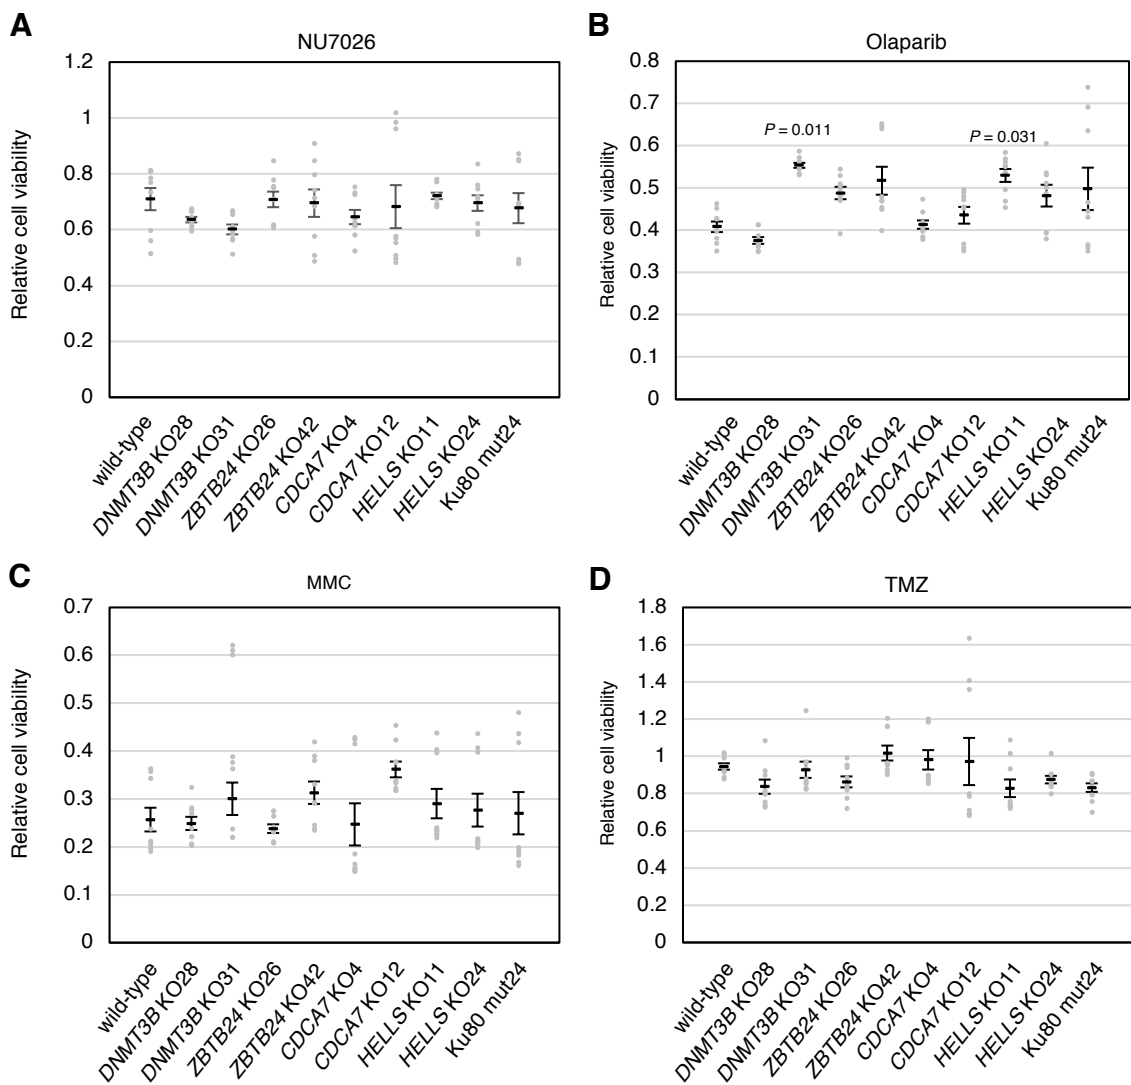

**Supplemental Figure 8. Evaluation of various repair pathways in ICF mutant cells.** (A) Relative viability of the mutant cells treated with 10  $\mu$ M DNA-PK inhibitor, NU7026, for 48 h. The viability was measured by a tetrazolium-based assay and the value for untreated cells was set as 1.0. Welch's *t*-test was done compared against *Ku80* mutant cells. There is no cells showing statistically significant difference even before Bonferroni correction. (B-D) Relative viability of the mutant cells treated with 160  $\mu$ M PARP1/2 inhibitor, olaparib (B), 10  $\mu$ g/ml MMC (C) or 100  $\mu$ M TMZ (D) for 48 h. Welch's *t*-test was done compared against wild-type cells. There is no cells showing statistically significant difference after Bonferroni correction ( $*P < 0.0011$  was considered statistically significant at the 5% level). The exact P-values, which were significant ( $P < 0.05$ ) before the correction, are shown for reference. (A-D) All assays were performed in biological triplicate and technical triplicate ( $n = 9$ ). Data are mean  $\pm$  S.E.M. MMC; mitomycin C, TMZ; temozolomide.

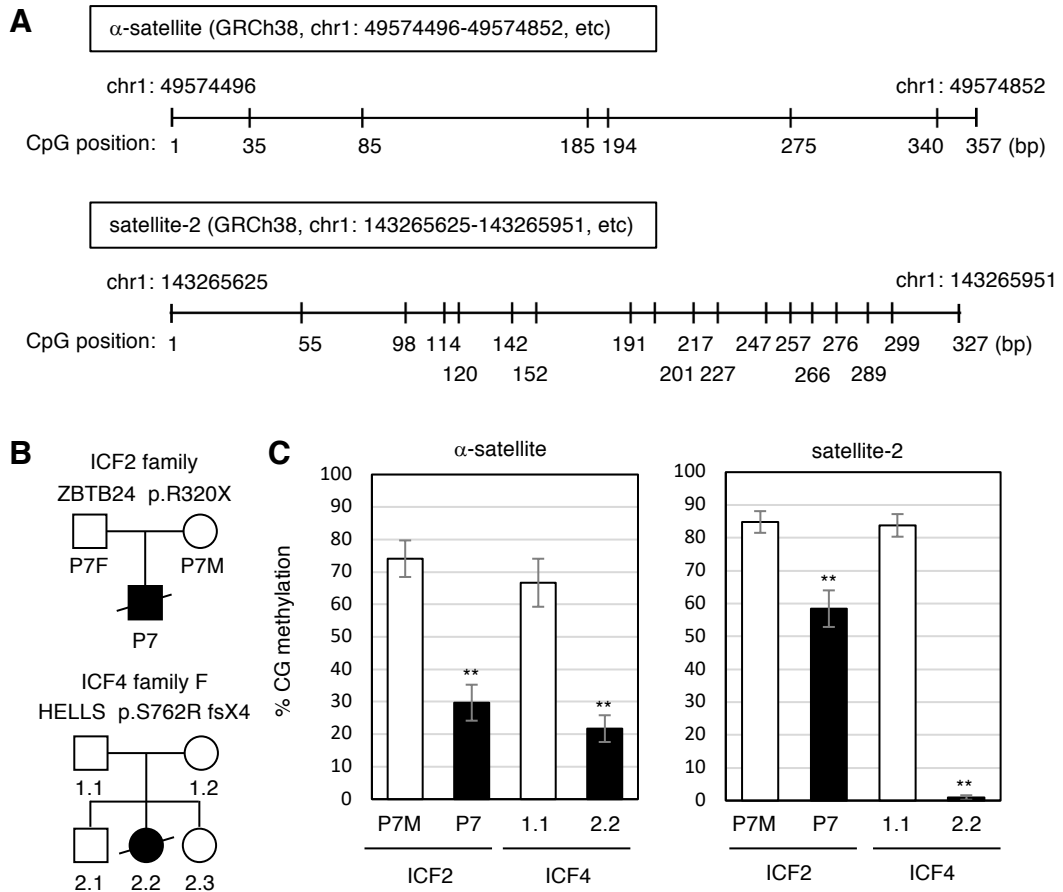

**Supplemental Figure 9. CG methylation of centromeric  $\alpha$ -satellite and pericentromeric satellite-2 repeats in ICF patients and their parents. (A)** Regions of  $\alpha$ -satellite and satellite-2 repeats selected for bisulfite sequencing. Positions of CpGs are indicated. There are six and sixteen CpGs in  $\alpha$ -satellite and satellite-2 regions, respectively. **(B)** Family trees of ICF2 and ICF4 patients and their parents (14, 15). **(C)** CG methylation (%) of each satellite repeat in an ICF2 patient (P7), his mother (P7M), an ICF4 patient (2.2), and her father (1.1) determined by bisulfite sequencing. PCR products were cloned into TA-vector and at least 8 clones were sequenced for each sample. Data are mean  $\pm$  S.E.M. \*\* $P < 0.01$  (Mann-Whitney  $U$  test).

**Supplemental Table 1. Proteins coimmunoprecipitate with FLAG-CDCA7 (mutation-insensitive) (peptide  $\geq 2$ , R274C/WT  $\geq 0.6$ )**

| Proteins      | MW      | CDCA7_WT | CDCA7_R274C | R274C/WT |
|---------------|---------|----------|-------------|----------|
| CDCA7         | 43,458  | 155      | 137         | 0.88     |
| Histone H1.4  | 21,852  | 30       | 21          | 0.70     |
| Histone H1.3  | 22,336  | 26       | 29          | 1.12     |
| HUWE1         | 485,523 | 26       | 18          | 0.69     |
| DDX21         | 87,804  | 16       | 14          | 0.88     |
| HELLS         | 97,639  | 14       | 11          | 0.79     |
| HNRH2         | 49,517  | 13       | 14          | 1.08     |
| 1433B         | 28,179  | 13       | 12          | 0.92     |
| 1433Z         | 27,899  | 13       | 10          | 0.77     |
| 1433F         | 28,372  | 12       | 11          | 0.92     |
| 1433G         | 28,456  | 10       | 12          | 1.20     |
| TOP1          | 91,125  | 8        | 8           | 1.00     |
| AP2A1         | 108,561 | 8        | 6           | 0.75     |
| CSNK2A2       | 41,358  | 7        | 6           | 0.86     |
| NOP2          | 89,589  | 6        | 10          | 1.67     |
| P53           | 44,196  | 6        | 6           | 1.00     |
| AP2M1         | 49,965  | 6        | 4           | 0.67     |
| ZFR           | 118,079 | 5        | 4           | 0.80     |
| Histone H2B1B | 13,942  | 4        | 11          | 2.75     |
| AP2B1         | 105,398 | 4        | 6           | 1.50     |
| H2A1A         | 14,225  | 4        | 5           | 1.25     |
| NOM1          | 96,768  | 4        | 5           | 1.25     |
| 2AAA          | 66,065  | 4        | 3           | 0.75     |
| TCPH          | 59,842  | 3        | 4           | 1.33     |
| BYST          | 49,798  | 3        | 3           | 1.00     |
| MOV10         | 114,512 | 3        | 3           | 1.00     |
| UBP7          | 129,304 | 3        | 3           | 1.00     |
| LORI          | 26,828  | 3        | 2           | 0.67     |
| MAP7          | 84,116  | 3        | 2           | 0.67     |
| NOP56         | 66,408  | 3        | 2           | 0.67     |
| STAU1         | 63,428  | 2        | 5           | 2.50     |
| BAG2          | 23,928  | 2        | 2           | 1.00     |
| DDX18         | 75,702  | 2        | 2           | 1.00     |
| DDX54         | 98,819  | 2        | 2           | 1.00     |
| DHX57         | 157,103 | 2        | 2           | 1.00     |
| MA7D1         | 93,106  | 2        | 2           | 1.00     |
| PP1G          | 37,701  | 2        | 2           | 1.00     |

**Supplemental Table 2. Proteins coimmunoprecipitate with FLAG-CDCA7 (mutation-sensitive) (peptide  $\geq 2$ , R274C/WT  $<0.6$ )**

| Proteins      | MW      | CDCA7_WT | CDCA7_R274C | R274C/WT |
|---------------|---------|----------|-------------|----------|
| Histone H2B1C | 13,898  | 28       | 7           | 0.25     |
| Histone H3.1  | 15,613  | 16       | 8           | 0.50     |
| Histone H4    | 11,360  | 16       | 7           | 0.44     |
| Ku80          | 83,222  | 10       | 1           | 0.10     |
| SMARCA5       | 122,513 | 9        | 5           | 0.56     |
| TCPD          | 58,401  | 9        | 5           | 0.56     |
| SUPT16H       | 120,409 | 7        | 2           | 0.29     |
| FBRL          | 33,877  | 6        | 2           | 0.33     |
| EIF3J         | 29,159  | 6        | 1           | 0.17     |
| PRKDC         | 473,749 | 5        | 1           | 0.20     |
| RRBP1         | 152,780 | 5        | 1           | 0.20     |
| CSNK2A1       | 45,229  | 4        | 2           | 0.50     |
| RFC2          | 39,588  | 4        | 2           | 0.50     |
| LA            | 46,979  | 4        | 1           | 0.25     |
| SYEP          | 172,080 | 4        | 1           | 0.25     |
| RBBP7         | 48,132  | 4        | 0           | ND       |
| RCL1          | 41,273  | 4        | 0           | ND       |
| NKRF          | 78,308  | 3        | 1           | 0.33     |
| LAMC3         | 176,933 | 3        | 0           | ND       |
| MYH10         | 229,827 | 3        | 0           | ND       |
| NEUA          | 49,033  | 3        | 0           | ND       |
| POTEE         | 122,882 | 3        | 0           | ND       |
| RBM4          | 40,688  | 3        | 0           | ND       |
| RFA1          | 68,723  | 3        | 0           | ND       |
| WDR5          | 37,136  | 3        | 0           | ND       |
| BMS1          | 146,571 | 2        | 1           | 0.50     |
| GRSF1         | 53,606  | 2        | 1           | 0.50     |
| IF4A1         | 46,353  | 2        | 1           | 0.50     |
| NOG1          | 74,317  | 2        | 1           | 0.50     |
| PSME3         | 29,602  | 2        | 1           | 0.50     |
| RALY          | 32,501  | 2        | 1           | 0.50     |
| REN3B         | 57,841  | 2        | 1           | 0.50     |
| RFC4          | 40,170  | 2        | 1           | 0.50     |
| SSRP1         | 81,367  | 2        | 1           | 0.50     |
| THOC4         | 26,872  | 2        | 1           | 0.50     |
| UBE2O         | 142,631 | 2        | 1           | 0.50     |
| ARID1A        | 242,805 | 2        | 0           | ND       |
| BUB3          | 37,587  | 2        | 0           | ND       |
| DNJA3         | 53,083  | 2        | 0           | ND       |
| ECHB          | 51,547  | 2        | 0           | ND       |
| EXOC4         | 111,170 | 2        | 0           | ND       |
| H1FNT         | 28,213  | 2        | 0           | ND       |
| Histone H1X   | 22,474  | 2        | 0           | ND       |
| Histone H2AX  | 15,135  | 2        | 0           | ND       |
| KDM8          | 47,867  | 2        | 0           | ND       |
| LYAR          | 44,044  | 2        | 0           | ND       |
| M3K7          | 67,895  | 2        | 0           | ND       |
| MAGB1         | 39,184  | 2        | 0           | ND       |
| TFAM          | 29,306  | 2        | 0           | ND       |
| WDR20         | 63,709  | 2        | 0           | ND       |

**Supplemental Table 3. Proteins coimmunoprecipitate with FLAG–HELLS (mutation-insensitive) (peptide  $\geq$  2, R274C/WT  $\geq$  0.6)**

| <b>Proteins</b> | <b>MW</b> | <b>HELLS_WT</b> | <b>HELLS_Q699R</b> | <b>Q699R/WT</b> |
|-----------------|-----------|-----------------|--------------------|-----------------|
| HELLS           | 97,639    | 283             | 273                | 1.0             |
| IMA1            | 58,168    | 4               | 3                  | 0.8             |
| Histone H1.3    | 22,336    | 3               | 4                  | 1.3             |
| LA              | 46,979    | 3               | 3                  | 1.0             |
| GBB1            | 38,151    | 3               | 2                  | 0.7             |
| Histone H3.1    | 15,613    | 3               | 2                  | 0.7             |
| M4A10           | 30,070    | 2               | 5                  | 2.5             |
| MYH10           | 229,827   | 2               | 3                  | 1.5             |
| 1433Z           | 27,899    | 2               | 2                  | 1.0             |
| HAT1            | 49,880    | 2               | 2                  | 1.0             |
| POTEE           | 122,882   | 2               | 2                  | 1.0             |

**Supplemental Table 4. Proteins coimmunoprecipitate with FLAG–HELLS (mutation-sensitive) (peptide  $\geq$  2, R274C/WT <0.6)**

| Proteins      | MW      | HELLS_WT | HELLS_Q699R | Q699R/WT |
|---------------|---------|----------|-------------|----------|
| Histone H2A1A | 14,225  | 6        | 0           | ND       |
| MAGB1         | 39,184  | 4        | 1           | 0.3      |
| DIDO1         | 245,434 | 4        | 0           | ND       |
| TBB6          | 50,281  | 4        | 0           | ND       |
| GRDN          | 216,593 | 3        | 1           | 0.3      |
| 1433G         | 28,456  | 3        | 0           | ND       |
| GBB2          | 38,048  | 3        | 0           | ND       |
| KDIS          | 198,016 | 3        | 0           | ND       |
| Histone H2B1M | 13,981  | 3        | 0           | ND       |
| Histone H2B1B | 13,942  | 2        | 1           | 0.5      |
| Histone H2B1H | 13,884  | 2        | 1           | 0.5      |
| ATPA          | 59,828  | 2        | 1           | 0.5      |
| APC           | 313,622 | 2        | 0           | ND       |
| RBBP7         | 48,132  | 2        | 0           | ND       |
| RN152         | 23,141  | 2        | 0           | ND       |
| SPR2D         | 8,584   | 2        | 0           | ND       |
| ZN717         | 108,091 | 2        | 0           | ND       |

**Supplemental Table 5. Summary of mutations introduced into HEK293 cells by genome editing**  
(See also [Supplemental Figure 1](#))

| Gene          | Disease         | Chr.         | Ensembl Transcript ID | Clone # | Mutations generated by CRISPR/Cas9 system <sup>A</sup>                                                                                                               | Targeted exon | Premature stop codon         | Total exon numbers |
|---------------|-----------------|--------------|-----------------------|---------|----------------------------------------------------------------------------------------------------------------------------------------------------------------------|---------------|------------------------------|--------------------|
| <i>DNMT3B</i> | ICF1            | 20q1<br>1.21 | ENST00000348<br>286.6 | KO28    | c.440_441insA (p.Arg148fsX140),<br>c.439_442delAGAC (p.Arg147fsX43),<br>c.433_442del TCCTGAGAC (p.Ser145fsX43)                                                       | exon 6        | exon 8,<br>exon 6,<br>exon 6 | 23                 |
| <i>DNMT3B</i> | ICF1            | 20q1<br>1.21 | ENST00000348<br>286.6 | KO31    | c.438_442delGAGAC (p.Arg147fsX139),<br>c.436_455delCTGAGACGGGGCAACAGC (p.Lys146fsX135),<br>c.437_470delTGAGACGGGGCAACAGCATCGGCAGGAACGC<br>C (p.Lys146fsX34)          | exon 6        | exon 8,<br>exon 8,<br>exon 6 | 23                 |
| <i>ZBTB24</i> | ICF2            | 6p21         | ENST00000230<br>122.3 | KO26    | c.1141_1142insA (p.Asp381fsX50),<br>c.1129_1157delTCTTTTACCTGTGATCAATGCGGAAAAATA<br>(p.Ser377fsX44)                                                                  | exon 4        | exon 6,<br>exon 6            | 7                  |
| <i>ZBTB24</i> | ICF2            | 6p21         | ENST00000230<br>122.3 | KO42    | c.1141_1142insA (p.Asp381fsX50),<br>c.1136_1142delCCTGTGA (p.379ThrfsX12),<br>c.1142_1152delATCAATGCGGA (p.Asp381fsx46)                                              | exon 4        | exon 6,<br>exon 4,<br>exon 6 | 7                  |
| <i>CDCA7</i>  | ICF3            | 2q31.<br>1   | ENST00000347<br>703.7 | KO4     | c.824delA (p.Gln275fsX72),<br>c.815_830delAATGCCGTGAGAAC (p.Gln272fsX70)                                                                                             | exon 7        | exon 8,<br>exon 8            | 9                  |
| <i>CDCA7</i>  | ICF3            | 2q31.<br>1   | ENST00000347<br>703.7 | KO12    | c.824_834delAGAAGACTATT_835G>A (p.Gln275fsX27),<br>c.799_835delGGCTCTACTTGTATCAATGCCGTGAGAACACTAT<br>TG (p.Gly267fsX68)                                              | exon 7        | exon 9,<br>exon 8            | 9                  |
| <i>HELLS</i>  | ICF4            | 10q2<br>3.33 | ENST00000348<br>459.9 | KO11    | c.2103_2104delTTC (p.Lys702fsX4)                                                                                                                                     | exon 19       | exon 19,<br>exon 19          | 22                 |
| <i>HELLS</i>  | ICF4            | 10q2<br>3.33 | ENST00000348<br>459.9 | KO24    | c.2095_2104delCAGTCGGATC (p.Gln699fsX43),<br>c.2105_2111delTTCAGGC (p.Lys702fsX41)                                                                                   | exon 19       | exon 19,<br>exon 19          | 22                 |
| <i>Ku80</i>   | Cancer,<br>SCID | 2q35         | ENST00000392<br>132.6 | mut24   | c.252_253insT (p.Lys183fsX21),<br>c.253_254insAATCCTGCGGCCAACTGGCGATTATCAGCCAGAT<br>GAGCAGGCATG_254T>A(p.Lys183X),<br>c.253_259TTAGGT>GAAAGG(p.183_184LysGly>GluArg) | exon 6        | exon 6,<br>exon 6,<br>N/A    | 21                 |

<sup>A</sup>HEK293 cells are hypotriploid.

**Supplemental Table 6. Primer sequences used in this study**

| <b>Gene</b>          | <b>Primer name</b> | <b>Sequence</b>                 | <b>Experiment</b> |
|----------------------|--------------------|---------------------------------|-------------------|
| <i>Cas9</i>          | Forward-1          | 5'-TGGACTATAAGGACCACGAC-3'      | Genomic PCR       |
| <i>Cas9</i>          | Forward-2          | 5'-AAGAGAATGCTGGCCTCTGC-3'      | Genomic PCR       |
| <i>Cas9</i>          | Reverse-1          | 5'-TCGATCCGTGTCTCGTACAG-3'      | Genomic PCR       |
| <i>DNMT3B</i>        | Forward            | 5'-CTGAAGCCCATGTTGGAGTG-3'      | qRT-PCR           |
| <i>DNMT3B</i>        | Reverse            | 5'-ATTTGTCTTGAGGCGCTTGG-3'      | qRT-PCR           |
| <i>ZBTB24</i>        | Forward            | 5'-AGGCCCGCTGTAAAGACTGT-3'      | qRT-PCR           |
| <i>ZBTB24</i>        | Reverse            | 5'-GGACCTGTAGCGAGTGCTTC-3'      | qRT-PCR           |
| <i>CDCA7</i>         | Forward            | 5'-TGGAAGAAATTACAGAGGAGG-3'     | qRT-PCR           |
| <i>CDCA7</i>         | Reverse            | 5'-ATGACAAGTAGAGCCCAGTG-3'      | qRT-PCR           |
| <i>HELLS</i>         | Forward            | 5'-ACTGATCAGTCAAATACAGCC-3'     | qRT-PCR           |
| <i>HELLS</i>         | Reverse            | 5'-CTGCAGCTTCAGATTAACCTC-3'     | qRT-PCR           |
| <i>Ku80</i>          | Forward            | 5'-GGAGGGGAAGTGCTTCTCTG-3'      | qRT-PCR           |
| <i>Ku80</i>          | Reverse            | 5'-CAGCCGACTTGAGGATTAG-3'       | qRT-PCR           |
| <i>ACTB</i>          | Forward            | 5'-CCAACCGCGAGAAGATGA-3'        | qRT-PCR           |
| <i>ACTB</i>          | Reverse            | 5'-CCAGAGGCGTACAGGGATAG-3'      | qRT-PCR           |
| Uncut and joined DNA | BP-F1              | 5'-GTACGGTGGGAGGTCTATATAAG-3'   | Genomic PCR       |
| Uncut and joined DNA | 300-DR             | 5'-GCCGTCCTCGTACTTCTCGAT-3'     | Genomic PCR       |
| Internal control     | 2500-DF            | 5'-CCCTGAACCTGAAACATAAAATGA-3'  | Genomic PCR       |
| Internal control     | 2500-DR            | 5'-TGTGAAATTTGTGATGCTATTGCTT-3' | Genomic PCR       |
| satellite-2          | Forward            | 5'-AATGAAAGGAGTTATTATTTAATGG-3' | Bisulfite PCR     |
| satellite-2          | Reverse            | 5'-CATTCCATTCCATTAAATAATTCC-3'  | Bisulfite PCR     |
| $\alpha$ -satellite  | Forward            | 5'-GTTTTGAGGTTAAAGGTAGAAAAG-3'  | Bisulfite PCR     |
| $\alpha$ -satellite  | Reverse            | 5'-TTCTTTTCTACCATTAACCTC-3'     | Bisulfite PCR     |



**Supplemental Table 7. Antibodies used in this study**

| <b>Name</b>                                   | <b>Company</b>            | <b>Catalog#</b> | <b>Clone #</b>  | <b>Dilution</b> |
|-----------------------------------------------|---------------------------|-----------------|-----------------|-----------------|
| anti-FLAG mouse monoclonal antibody           | MBL                       | M185-3L         | FLA-1           | 1:1000          |
| anti-DNMT3B sheep polyclonal antibody         | R&D systems               | AF7646-SP       | -               | 1:1000          |
| anti-ZBTB24 guinea pig polyclonal antibody    | MBL                       | PM085           | -               | 1:1000          |
| anti-CDCA7 rabbit polyclonal antibody         | MBL                       | MB0148          | -               | 1:1000          |
| anti-HELLS rabbit polyclonal antibody         | Santa Cruz Biotechnology  | sc-28202        | -               | 1:1000          |
| anti-Ku80 rabbit monoclonal antibody          | Abcam                     | Ab79391         | EPR3467         | 1:1000          |
| anti-Ku80 mouse monoclonal antibody           | Abcam                     | ab119935        | 5C5             | 1:1000          |
| anti-Ku70 rabbit monoclonal antibody          | Abcam                     | ab92450         | EPR4027         | 1:1000          |
| anti-p53 rabbit monoclonal antibody           | Cell Signaling Technology | 2527            | 7F5             | 1:1000          |
| anti-H2AX rabbit monoclonal antibody          | Cell Signaling Technology | 7631            | D17A3           | 1:1000          |
| anti- $\gamma$ H2AX mouse monoclonal antibody | Millipore                 | 05-636          | JBW301          | 1:1000          |
| anti-SMARCA5 rabbit polyclonal antibody       | Abcam                     | Ab3749          | -               | 1:1000          |
| anti-SUPT16H rabbit monoclonal antibody       | Abcam                     | Ab108960        | EPR3685         | 1:1000          |
| anti-Histone H3 rabbit polyclonal antibody    | Abcam                     | Ab1791          | -               | 1:1000          |
| anti-UHRF1 mouse monoclonal antibody          | BD Biosciences            | 612264          | 28/ICBP90       | 1:1000          |
| anti-PCNA mouse monoclonal antibody           | BioLegend                 | 307902          | PC10            | 1:1000          |
| anti-GFP rabbit polyclonal antibody           | MBL                       | 598             | -               | 1:1000          |
| anti-Pericentrin mouse monoclonal antibody    | Abcam                     | ab28144         | mAbcam<br>28144 | 1:1000          |
| anti-ACTB mouse monoclonal antibody           | Santa Cruz Biotechnology  | sc-69879        | AC-15           | 1:1000          |
| anti-DDX21 rabbit polyclonal antibody         | Proteintech               | 10528-1-AP      | -               | 1:1000          |
